# Supplementary material for: Evaluation of Antimicrobial Activity by Marine Nocardiopsis dassonvillei against Foodborne Listeria monocytogenes and Shiga Toxin-Producing Escherichia coli
Source: MDPI journal article supplement (doi:10.3390/microorganisms11102539), 2023-10-12
Supplement: s1 [file s1]

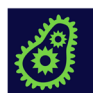

## Supplementary data

# Evaluation of antimicrobial activity by marine *Nocardiopsis dassonvillei* against foodborne *Listeria monocytogenes* and Shiga toxin-producing *Escherichia coli*

Siyanda S. Ngema<sup>1</sup>, Solomuzi H. Khumalo<sup>1</sup>, Michael C. Ojo<sup>1</sup>, Ofentse J. Poee<sup>2</sup>, Tsolanku S. Malilehe<sup>3</sup>, Albert K. Basson<sup>1</sup> and Evelyn Madoroba<sup>1\*</sup>

<sup>1</sup> Department of Biochemistry and Microbiology; ngemasiyanda05@gmail.com; [elsherawy7@gmail.com](mailto:elsherawy7@gmail.com); [mikekonyegwachie2015@gmail.com](mailto:mikekonyegwachie2015@gmail.com); BassonA@unizulu.ac.za; evelyn.madoroba@gmail.com; MadorobaE@unizulu.ac.za

<sup>2</sup> Discipline of Biochemistry, School of Life Sciences, University of KwaZulu-Natal, Durban, South Africa PoeeO@ukzn.ac.za

<sup>3</sup> Department of Water and Sanitation, University of Limpopo, Private Bag X1106, Polokwane, 0727, South Africa tsolanku.maliehe@ul.ac.za

\* Correspondence: evelyn.madoroba@gmail.com; [MadorobaE@unizulu.ac.za](mailto:MadorobaE@unizulu.ac.za)

**Citation:** To be added by editorial staff during production.

Academic Editor: Firstname Last-name

Received: date

Accepted: date

Published: date

**Publisher's Note:** MDPI stays neutral with regard to jurisdictional claims in published maps and institutional affiliations.

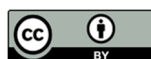

**Copyright:** © 2022 by the authors. Submitted for possible open access publication under the terms and conditions of the Creative Commons Attribution (CC BY) license (<https://creativecommons.org/licenses/by/4.0/>).

**Table S1.** Compounds identified by GC-MS in the chloroform extract of *N. dassonvillei*  
SOD(B)ST2SA2

| Peak# | R.Time | Area    | Area% | Height  | Height% | Name                                             |
|-------|--------|---------|-------|---------|---------|--------------------------------------------------|
| 1     | 9.130  | 211980  | 0.23  | 65206   | 0.28    | Acetamide, N-(.beta.-mercaptoethyl)-             |
| 2     | 9.175  | 373287  | 0.40  | 86963   | 0.38    | 1,2,4,5-Tetrazine, hexahydro-1,2,4,5-tetramethy  |
| 3     | 9.250  | 206326  | 0.22  | 76562   | 0.33    | 2-Heptanone, 5-methyl-                           |
| 4     | 9.300  | 35784   | 0.04  | 64479   | 0.28    | Cyclohexan-1,4,5-triol-3-one-1-carboxylic acid   |
| 5     | 9.315  | 146328  | 0.16  | 64669   | 0.28    | Butanamine, 2,2-dinitro-N-methyl-                |
| 6     | 9.380  | 139656  | 0.15  | 60365   | 0.26    | (3s)-Pentanol, 4,4-dimethyl-(2s)-[(tert.butyloxy |
| 7     | 9.430  | 307005  | 0.33  | 50129   | 0.22    | dl-3-Aminoisobutyric acid, N-methyl-, methyl e   |
| 8     | 10.110 | 175018  | 0.19  | 70704   | 0.31    | 2,4(1H,3H)-Pyrimidinedione, dihydro-5-hydrox     |
| 9     | 10.155 | 226458  | 0.25  | 86358   | 0.38    | Tetraacetyl-d-xylonic nitrile                    |
| 10    | 10.190 | 225361  | 0.24  | 105667  | 0.46    | 2-Acetyl-amino-3-hydroxy-propionic acid          |
| 11    | 10.220 | 267666  | 0.29  | 132157  | 0.58    | Ethylamine, 2-(adamantan-1-yl)-1-methyl-         |
| 12    | 10.260 | 123177  | 0.13  | 147519  | 0.64    | Acetamide, 2,2,2-trichloro-                      |
| 13    | 10.320 | 884208  | 0.96  | 211519  | 0.92    | n-Hexadecanoic acid                              |
| 14    | 10.365 | 229977  | 0.25  | 197549  | 0.86    | 3-Hexene-2,5-diol                                |
| 15    | 10.395 | 377728  | 0.41  | 243640  | 1.06    | (+)-2-Hydroxyoctanoic acid, acetate              |
| 16    | 10.410 | 683729  | 0.74  | 262216  | 1.14    | Propanedioic acid, propyl-                       |
| 17    | 10.475 | 991521  | 1.07  | 314815  | 1.37    | Acetic acid, [(aminocarbonyl)amino]oxo-          |
| 18    | 10.523 | 1462876 | 1.58  | 347052  | 1.51    | Acetic acid, mercapto-, hexyl ester              |
| 19    | 10.580 | 381422  | 0.41  | 337616  | 1.47    | 2-Amino-1,3-propanediol                          |
| 20    | 10.600 | 2008032 | 2.17  | 326741  | 1.42    | 3-Butenamide                                     |
| 21    | 10.745 | 496823  | 0.54  | 254460  | 1.11    | Pterin-6-carboxylic acid                         |
| 22    | 10.780 | 487622  | 0.53  | 234248  | 1.02    | Dec-9-en-6-oxo-1-ylamide                         |
| 23    | 10.795 | 1216371 | 1.32  | 240812  | 1.05    | Tetraacetyl-d-xylonic nitrile                    |
| 24    | 11.396 | 183148  | 0.20  | 68991   | 0.30    | Carbonochloridic acid, decyl ester               |
| 25    | 12.263 | 363340  | 0.39  | 197357  | 0.86    | 2,5-Cyclohexadiene-1,4-dione, 2,6-bis(1,1-dim    |
| 26    | 12.672 | 347074  | 0.38  | 79378   | 0.35    | 1b,4a-Epoxy-2H-cyclopenta[3,4]cyclopropa[8,      |
| 27    | 12.793 | 537547  | 0.58  | 197146  | 0.86    | Phenol, 2,4-bis(1,1-dimethylethyl)-              |
| 28    | 12.840 | 141944  | 0.15  | 66831   | 0.29    | Methyl 4,6-di-O-acetyl-2,3-diacetamido-2,3-di    |
| 29    | 12.880 | 148018  | 0.16  | 56144   | 0.24    | 4H-1,3,4-Triazol-3-amine, N-dimethylaminome      |
| 30    | 13.505 | 355849  | 0.39  | 183223  | 0.80    | 1-Pentadecene                                    |
| 31    | 13.575 | 3170477 | 3.43  | 1224825 | 5.33    | Diethyl Phthalate                                |
| 32    | 13.700 | 259201  | 0.28  | 126006  | 0.55    | 4,5-Dicarboxy-1,2,3-triazole                     |
| 33    | 13.731 | 641870  | 0.69  | 128624  | 0.56    | 2H-Azepine-2-thione, hexahydro-                  |
| 34    | 14.543 | 1021053 | 1.10  | 209437  | 0.91    | 1H-Pyrrolo[2,3-b]pyridine-2,6-dione, 3,3a,4,5-   |
| 35    | 14.650 | 93480   | 0.10  | 73437   | 0.32    | Cyclopentanecarboxylic acid, 2-acetyl-5-methy    |
| 36    | 14.701 | 357455  | 0.39  | 126085  | 0.55    | Acetamide, N-(2,4-dimethylphenyl)-               |
| 37    | 14.811 | 771031  | 0.83  | 296529  | 1.29    | Phenol, 4-(1,1,3,3-tetramethylbutyl)-            |
| 38    | 14.886 | 1046732 | 1.13  | 336573  | 1.47    | 1-(2,6-Dimethyl-4-propoxyphenyl)propan-1-on      |
| 39    | 14.936 | 446275  | 0.48  | 229748  | 1.00    | N-(Chroman-5-yl)acetamide                        |
| 40    | 15.003 | 1315900 | 1.42  | 296823  | 1.29    | 1,3-Cyclopentadiene, 2,3,4,5-tetramethyl-1-(4-   |
| 41    | 15.110 | 393725  | 0.43  | 193558  | 0.84    | Benzestrol                                       |
| 42    | 15.135 | 285726  | 0.31  | 114745  | 0.50    | Phenol, 3,5-diethyl-                             |
| 43    | 15.214 | 769338  | 0.83  | 189619  | 0.83    | Phenol, 2-methyl-4-(1,1,3,3-tetramethylbutyl)-   |
| 44    | 15.343 | 1613034 | 1.75  | 475671  | 2.07    | Psicofuranine                                    |
| 45    | 15.410 | 896182  | 0.97  | 196814  | 0.86    | Phenol, 2-methyl-4-(1,1,3,3-tetramethylbutyl)-   |
| 46    | 15.510 | 174144  | 0.19  | 78477   | 0.34    | Pentadec-7-ene, 7-bromomethyl-                   |
| 47    | 15.577 | 2188129 | 2.37  | 1099135 | 4.79    | 1-Octadecene                                     |
| 48    | 15.650 | 265908  | 0.29  | 121604  | 0.53    | Decane, 2,3,5,8-tetramethyl-                     |
| 49    | 15.952 | 508714  | 0.55  | 185490  | 0.81    | Isopropyl myristate                              |
| 50    | 16.134 | 102837  | 0.11  | 54362   | 0.24    | 9,9-Dimethoxybicyclo[3.3.1]nona-2,4-dione        |
| 51    | 16.237 | 427694  | 0.46  | 200054  | 0.87    | 2-Pentadecanone, 6,10,14-trimethyl-              |
| 52    | 16.577 | 90503   | 0.10  | 51769   | 0.23    | 1,2-Benzenedicarboxylic acid, bis(2-methylpro    |
| 53    | 16.792 | 426637  | 0.46  | 112113  | 0.49    | Pyrrolo[1,2-a]pyrazine-1,4-dione, hexahydro-3    |
| 54    | 16.965 | 495206  | 0.54  | 63850   | 0.28    | Bromoacetic acid, tridecyl ester                 |
| 55    | 17.366 | 1893030 | 2.05  | 733144  | 3.19    | 7,9-Di-tert-butyl-1-oxaspiro(4,5)deca-6,9-diene  |
| 56    | 17.519 | 724160  | 0.78  | 193773  | 0.84    | Hexadecanoic acid, methyl ester                  |
| 57    | 17.675 | 1600267 | 1.73  | 546368  | 2.38    | Benzenepropanoic acid, 3,5-bis(1,1-dimethylet    |
| 58    | 17.779 | 338430  | 0.37  | 76462   | 0.33    | 2-Dodecen-1-yl(-)succinic anhydride              |
| 59    | 17.981 | 338870  | 0.37  | 86571   | 0.38    | Glutaric acid, dodecyl 2-methoxyphenyl ester     |

Table S1 continued

| Peak# | R.Time | Area     | Area% | Height  | Height% | Name                                          |
|-------|--------|----------|-------|---------|---------|-----------------------------------------------|
| 60    | 18.196 | 1281602  | 1.39  | 423387  | 1.84    | Dibutyl phthalate                             |
| 61    | 18.399 | 5411656  | 5.86  | 1144550 | 4.98    | Pentadecanoic acid                            |
| 62    | 18.745 | 693785   | 0.75  | 170359  | 0.74    | 5-Eicosene, (E)-                              |
| 63    | 18.861 | 8517166  | 9.22  | 2610749 | 11.37   | 1-Octadecene                                  |
| 64    | 18.985 | 559030   | 0.60  | 165914  | 0.72    | Hexadecane, 4-methyl-                         |
| 65    | 19.151 | 266106   | 0.29  | 63250   | 0.28    | 1H-1,2,4-Triazole, 1-octadecanoyl-            |
| 66    | 19.450 | 451454   | 0.49  | 155868  | 0.68    | 2H-2,4a-Ethanonaphthalen-8(5H)-one, hexahyd   |
| 67    | 19.495 | 888029   | 0.96  | 223424  | 0.97    | Isopropyl palmitate                           |
| 68    | 19.997 | 237839   | 0.26  | 74242   | 0.32    | Eicosanoic acid                               |
| 69    | 20.352 | 296490   | 0.32  | 63663   | 0.28    | Pentadecanoic acid                            |
| 70    | 20.774 | 210326   | 0.23  | 50097   | 0.22    | 18,19-Secoyohimban-19-oic acid, 16,17,20,21-  |
| 71    | 21.450 | 480308   | 0.52  | 92181   | 0.40    | trans-2-Dodecen-1-ol, pentafluoropropionate   |
| 72    | 21.475 | 100914   | 0.11  | 73016   | 0.32    | 2-(2-Carbamoylethyl)-2,3-dihydro-6-hydroxy-3  |
| 73    | 21.647 | 690627   | 0.75  | 126637  | 0.55    | 10-Octadecenoic acid, methyl ester            |
| 74    | 22.096 | 823511   | 0.89  | 138658  | 0.60    | Phytol, acetate                               |
| 75    | 23.398 | 19351394 | 20.94 | 2126400 | 9.26    | 6-Octadecenoic acid, (Z)-                     |
| 76    | 24.182 | 1642259  | 1.78  | 282620  | 1.23    | Octadecanoic acid, 2-(2-hydroxyethoxy)ethyl e |
| 77    | 24.780 | 1049722  | 1.14  | 181487  | 0.79    | Tetradecanamide                               |
| 78    | 24.875 | 96115    | 0.10  | 86818   | 0.38    | Cyclohexanol, 2-methyl-, cis-                 |
| 79    | 24.909 | 643379   | 0.70  | 108932  | 0.47    | Decane, 4-cyclohexyl-                         |
| 80    | 25.151 | 7228918  | 7.82  | 1165658 | 5.08    | Trifluoroacetoxy hexadecane                   |
| 81    | 25.376 | 626731   | 0.68  | 110530  | 0.48    | 2-methyltetracosane                           |
| 82    | 25.796 | 597973   | 0.65  | 92932   | 0.40    | Tetracosyl acetate                            |
| 83    | 27.959 | 1366662  | 1.48  | 209523  | 0.91    | N,N-Dimethyldodecanamide                      |
| 84    | 30.513 | 2474954  | 2.68  | 316980  | 1.38    | 2-Propenoic acid, pentadecyl ester            |
| 85    | 30.645 | 47976    | 0.05  | 53719   | 0.23    | 2-Oxepanone, 7-butyl-                         |

Ciprofloxacin

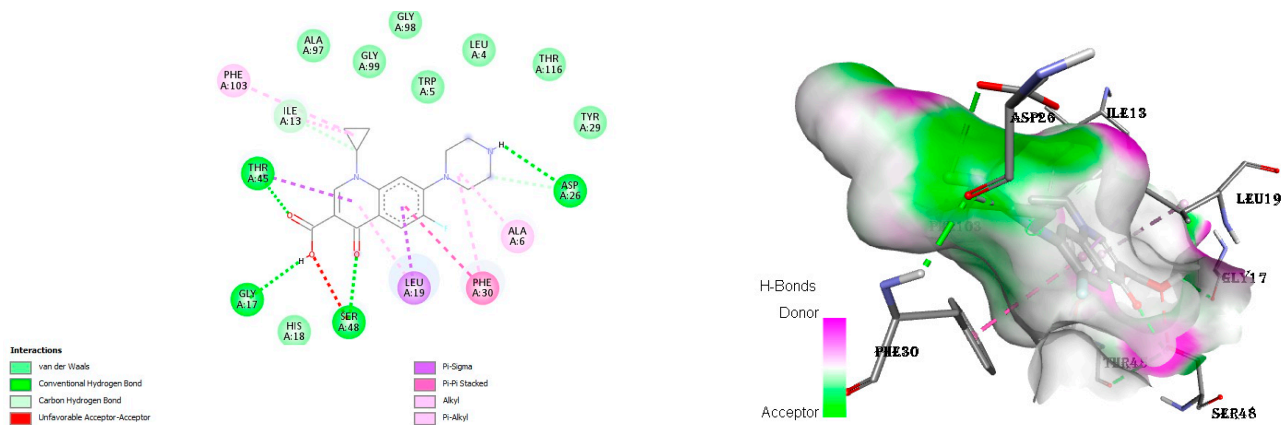

**Figure S1.** 2D and 3D binding interactions of ciprofloxacin against dihydrofolate reductase (PDB ID: 1DIS), respectively. The 3D interactions show the ligand in a binding pocket of the enzyme. Dashed lines indicate the interactions between the ligands and the amino acids of the enzyme.

## Pentadecanoic acid

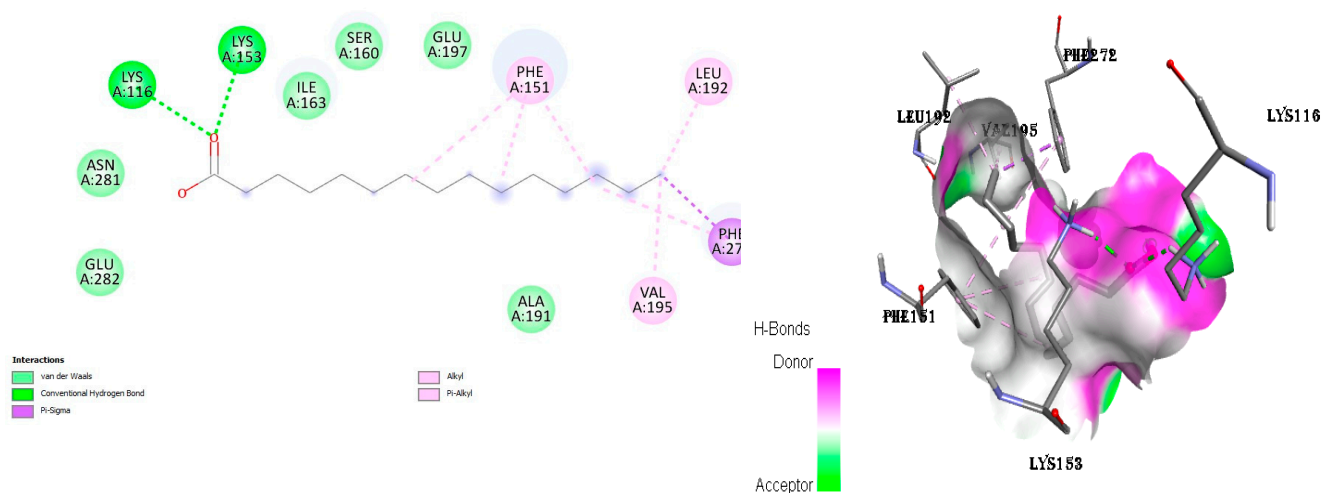

## Diethyl phthalate

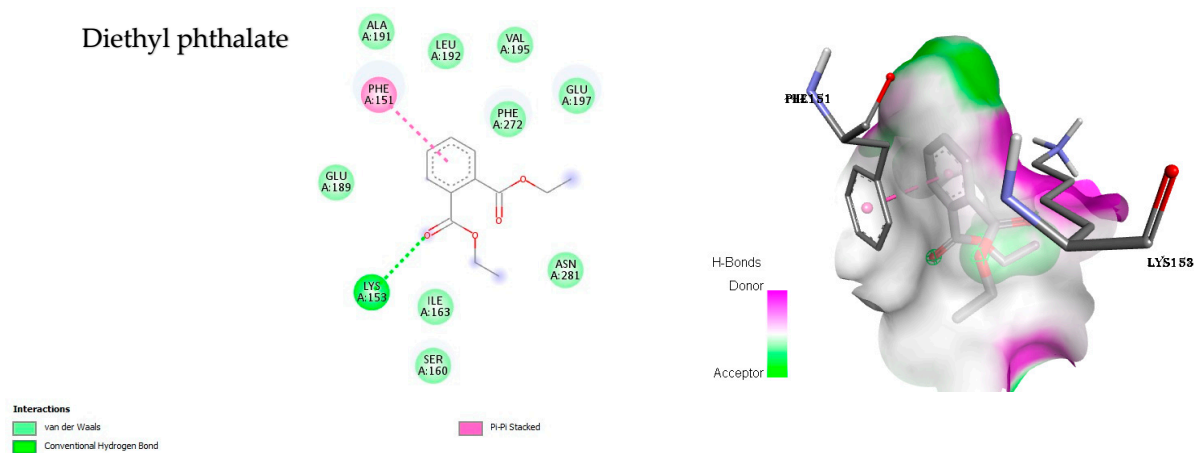

## 1-Octadecene

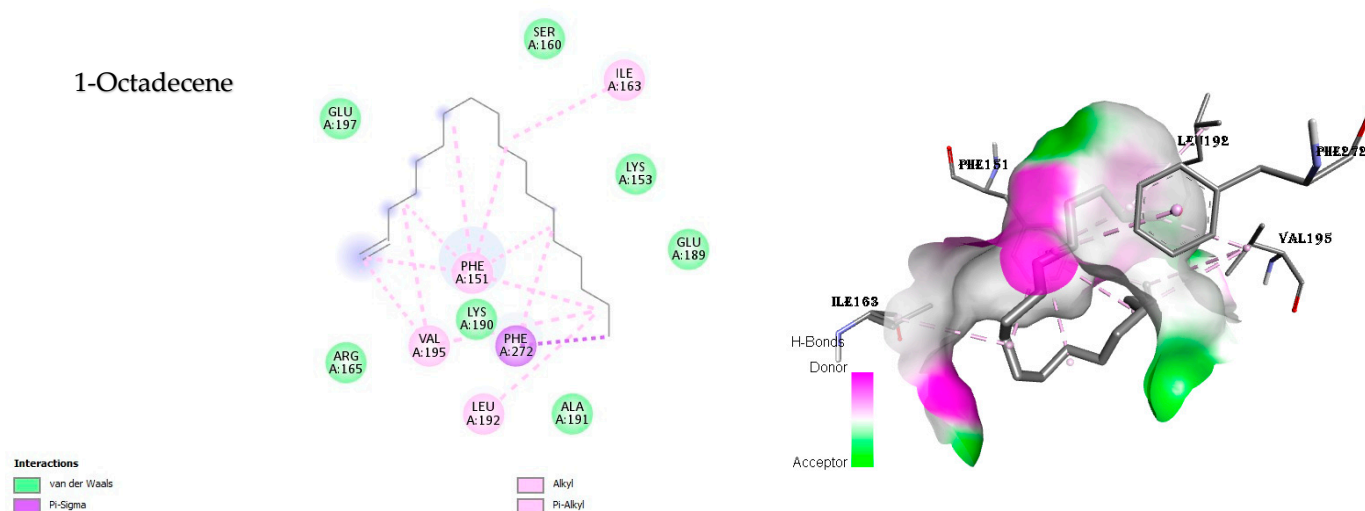

**Figure S2.** 2D and 3D binding interactions of compounds against D-alanine:D-alanine ligase (DDI) (PDB ID: 2Zdg), respectively. The 3D interactions show the ligand in a binding pocket of the enzyme. Dashed lines indicate the interactions between the ligands and the amino acids of the enzyme.

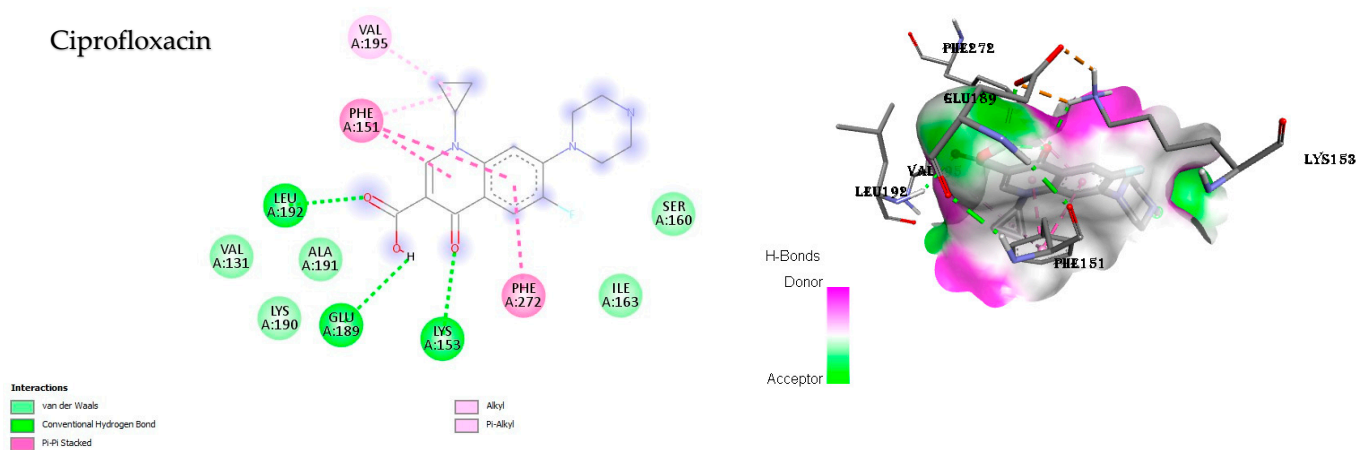

**Figure S3.** 2D and 3D binding interactions of ciprofloxacin against DDI (PDB ID: 2Zdg), respectively. The 3D interactions show the ligand in a binding pocket of the enzyme. Dashed lines indicate the interactions between the ligand and the amino acids of the enzyme.

## Pentadecanoic acid

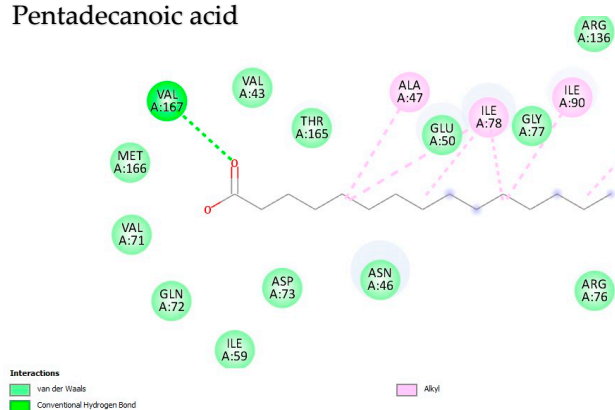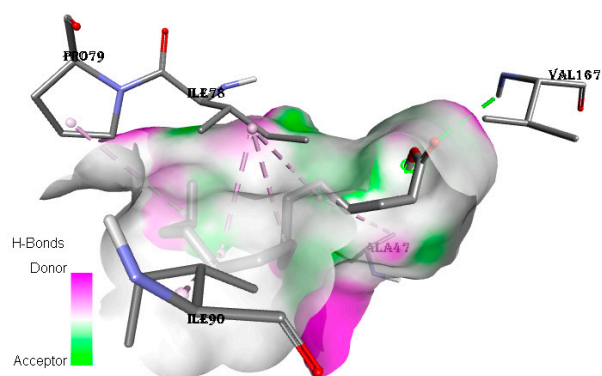

## Diethyl phthalate

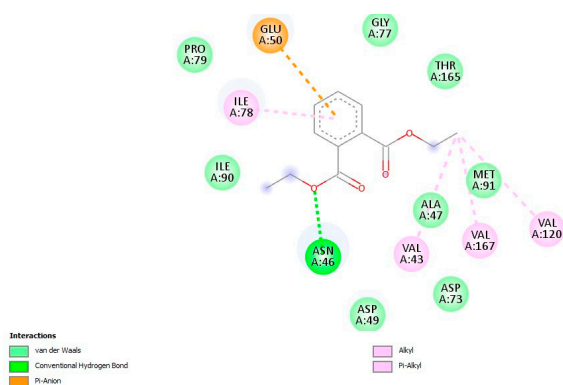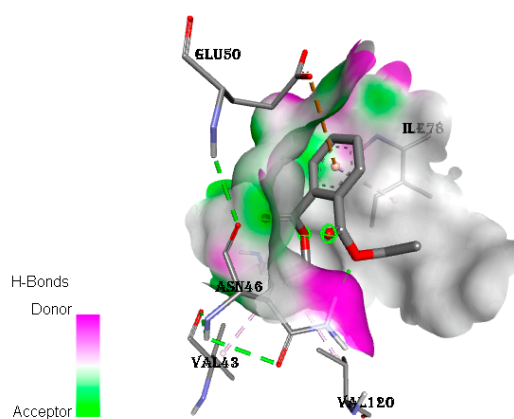

## 1-Octadecene

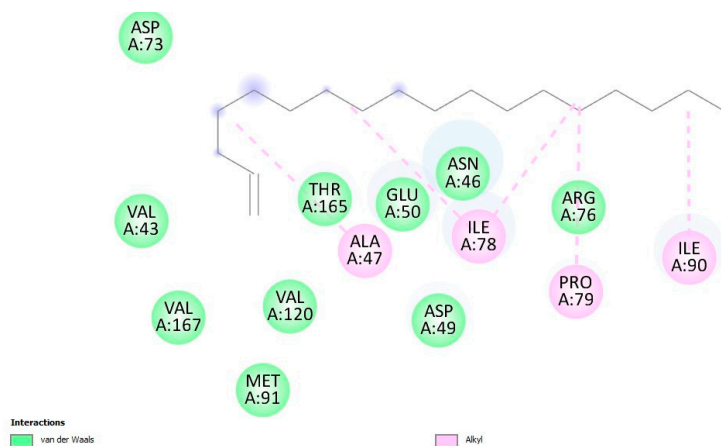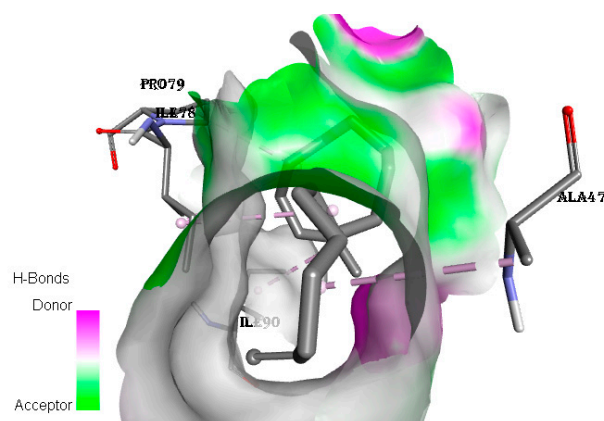

**Figure S4.** 2D and 3D binding interactions of compounds against DNA gyrase B (PDB ID: 1KZN), respectively. The 3D interactions show the ligand in a binding pocket of the enzyme. Dashed lines indicate the interactions between the ligands and the amino acids of the enzyme.

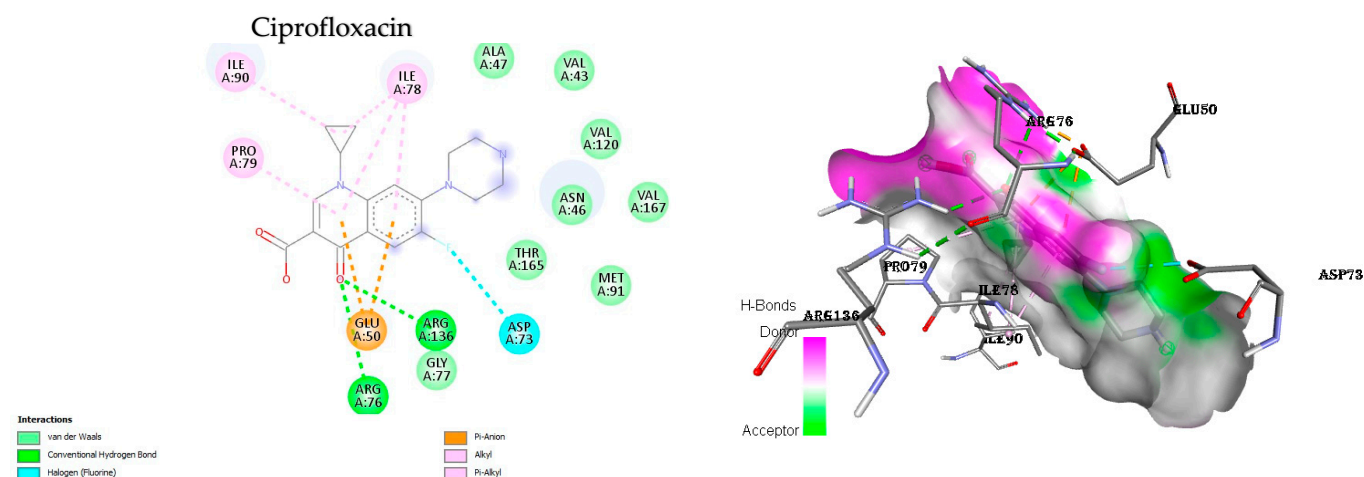

**Figure S5.** 2D and 3D binding interactions of ciprofloxacin against DNA gyrase B (PDB ID: 1KZN), respectively. The 3D interactions show the ligand in a binding pocket of the enzyme. Dashed lines indicate the interactions between the ligand and the amino acids of the enzyme.

#### Sequence of *Nocardiosis dassonvillei* strain SOD(B)ST2SA2 that showed activity during secondary screening for antibacterial activity

>SOD-B\_907-R

CTCCCCSGGCSGGGGGCGCTTATGCGTTAGCTACGGCGCGGAAACCGTGGAAAGTCCCCACACCTAKYGCCC  
AACGTTTACGGCATGGACTACCAGGGTATCTAATCCTGTTTCGCTCCCCATGCTTTTCGCTCCTCAGCGTCAGGTA  
AGGCCAGAGACCCGCCTTCGCCACCGGTGTTCTCCTGATATCTGCGCATTTACCGCTACACCAGGAATTC  
CAGTCTCCCCTACCTACCTCTAGCATGCCCGTATCCACTGCAGAACCGGAGTTAAGCCCCGGTCTTTACAGC  
AGACGCGACACGCCGCCTACGAGCTCTTTACGCCCAATAATTCCGGACAACGCTCGGACCCTACGTATTACC  
GCGGCTGCTGGCACGTAGTTAGCCGGTCCTTATCCCCACCTACCGTCAACCCGAAGAGAACTTCGAGCCTGC  
GTTGGTGGTAAAAGAGGTTTACAACCCGAAGGCCGTCATCCCCACGCGGCGTCGCTGCGTCAGGCTTTTCGC  
CCATTGCGCAATATTTCCCACTGCTGCCTCCCGCAGGAGTCTGGGCCGTGTCTCAGTCCAGTGTGGCCGGTC  
GCCCTCTCAGGCCGGCTACCCGTAATCGCCTTGGTAGGCCGTTACCCACCAACAAGCTGATAGGCCGCGAG  
CCCATCCCTGACCGAAAACTTTCCACCCTCCACCATGAGGTGGCGGGTTCGTATCCGGTATTAGACGGCGTTT  
CCACCGCTTATCCCGGAGTCAGGGGCAGGTTGCTCACGTGTTACTCACCCGTTTCGCCGCTCGTGTACCCCGAA  
AGGGCCTTACCGCTCGACTTGCATGTGTTAAGCACGCCGCCAGCGTTCGTCTGAGCCATAWWYWMAAMTY  
CT

>SOD-B\_1492-R

CMGGCCCCMMCTTCACTCACTCCCTCCMACAAGGGGTAGGCCG-  
CAAGTTTCGGGTGTT-  
GCCGACTTTCWTGACGTGACGGGCGGTGTGTACAAGGCCCGGGAACGTATTCACCGCGGC  
GTTGCTGATCCGCGATTACTAGCGACTCCACCTTCATGGGGTTCGAGTT-  
GCAGACCCCAATCCGAACTGAGACCGGCTTTTAGGGATTTCGCTCCACCTTACGGTATCGC  
ACGCCCATTTGTACCGGCCATTGTAGCATGTTTGCAGCCCAAGACATAAGGGG-  
CATGATGACTTGACGTCATCCCCACCTTCCTCCGAGTTGACCCCGGCAGTCTCCCATGAGT  
CCCCACCATTAAGTGCTGGCAACATGGAACAAGGGTTGCGTCTCGTTGCGG-  
GACTTAACCCAAACATCTCACGACACGAGCTGACGACAGCCATGCACCACCTGTACCCGC  
CAACTAAATGACCTCACATCTCTGCGAGTCCACGGGTGATGTCAAACCTTGG-  
TAAGGTTCTTCGCGTTGCGTCAATTAAGCAACATGCTCCGCCGCTTGTGCGGGCCCCCGT

CAATTCCTTTGAGTTTTAGCCTTGCGGCCG-  
TACTCCCCAGGCGGGGCGCTTAATGCGTTAGC-  
TACGGCGCGGAAACCGTGGAAGTCCCCACACCTAGCGCCCAACGTTTACGGCATGGACT  
ACCAGGG-  
TATCTAATCCTGTTCGCTCCCCATGCTTTCGCTCCTCAGCGTCAGGTAAGGCCCAGAGACC  
CGCCTTCGCCACCGGTGTTCTCCTGATATCTGCGCATTTACCGCTACACCAG-  
GAATTCCAGTCTCCCCTACCTACCTCTAGCATGCCCCGTATCCACTGCAGAACCGGAGTTAA  
GCCCCGGTCTTTCACAGCAGACGCGACACGCCGCCTACGAGCTCTTTACGCCCA-  
TAATTCCG-  
GACAACGCTCGGACCCTACGTATTACCGCGGCTGCTGGCACGTAGTTAGCCGGTCCTTATT  
CCCCACCTACCGTCAACCCGAAGARAACCTCGAGCCTGCGTTGGTGGTAAA-  
GAGGTTTACAACCGAAGGCGTCATCCCCACGCGCGTCGCTGCGTCAGCTTCGCATGGCC  
AAWWTCCATGCTGCTCCGCAGAGCTGACGKGTYYCAGTCAAGKTGAC-  
GTCGCCYTCAGCGATACGATGCATGTGCGTACTCACAMAGCKATAGCGCGGACCCATCT
